# Supplementary material
Source: PubMed Central journal article supplement (PMC2838543)
Supplement: 00145.2009_1.pdf [file 00145.2009_1.pdf]

1 **Supplement.**2 **DNA microarray data showing the altered gene expression in the medulla of CHF rats.**

3

| <b>Cluster Identification</b> | <b>Gene Bank Accession No</b> | <b>Description of Genes</b>                                                                                     | <b>Upregulation (+) or Downregulation (-)</b> |
|-------------------------------|-------------------------------|-----------------------------------------------------------------------------------------------------------------|-----------------------------------------------|
| 1369202_at                    | NM_017028.1                   | Mx proteins                                                                                                     | (+)                                           |
| 1387164_at                    | NM_030854.1                   | leukocyte cell derived chemotaxin 1 (Lect1)                                                                     | (+)                                           |
| 1380651_at                    | BI296352                      | ring finger protein (C3H2C3 type)                                                                               | (+)                                           |
| 1394689_at                    | BE117217                      | BAC clone RP23-202I21 from 18                                                                                   | (+)                                           |
| 1372923_at                    | BG377340                      | Rattus norvegicus peroxisomal biogenesis factor 11b (predicted) (Pex11b predicted),                             | (+)                                           |
| 1380552_at                    | AI555855                      | nuclear factor I/X (CCAAT-binding transcription factor)                                                         | (+)                                           |
| 1385314_at                    | AA923974                      | ESTs                                                                                                            | (+)                                           |
| 1395966_at                    | BI282914                      | BAC clone RP23-473E20 from 7,                                                                                   | (+)                                           |
| 1387366_at                    | NM_053412.1                   | interleukin enhancer binding factor 3 (Ilf3)                                                                    | (+)                                           |
| 1383864_at                    | BF412512                      | ESTs                                                                                                            | (+)                                           |
| 1378068_at                    | AW529368                      | 13 BAC CH230-72B9                                                                                               | (+)                                           |
| 1387868_at                    | BF289368                      | Rattus norvegicus lipopolysaccharide binding protein (Lbp)                                                      | (+)                                           |
| 1387144_at                    | NM_030994.1                   | integrin alpha 1 (Itga1)                                                                                        | (+)                                           |
| 1388004_at                    | AF087947.1                    | G protein-coupled receptor GPCR/CNS2 mRNA                                                                       | (+)                                           |
| 1373266_at                    | BG380826                      | Rattus norvegicus cDNA clone MGC:105610 IMAGE:7316049                                                           | (+)                                           |
| 26.1368182_at                 | NM_130739.1                   | acyl-CoA synthetase long-chain family member 6 (Acsl6),                                                         | (+)                                           |
| 1379472_at                    | AI232666                      | ESTs                                                                                                            | (+)                                           |
| 1378065_at                    | BI274450                      | ESTs                                                                                                            | (+)                                           |
| 1397326_at                    | BE119158                      | ESTs                                                                                                            | (+)                                           |
| 1367612_at                    | NM_134349.1                   | microsomal glutathione S-transferase 1 (Mgst1),                                                                 | (+)                                           |
| 1394793_at                    | AI715674                      | ESTs                                                                                                            | (+)                                           |
| 1367823_at                    | BF523128                      | ESTs                                                                                                            | (+)                                           |
| 1369798_at                    | U45946.1                      | Na,K-ATPase beta 2 subunit (ATP1B2) mRNA                                                                        | (+)                                           |
| 1371102_at                    | X05080.1                      | beta-globin                                                                                                     | (-)                                           |
| 1370501_at                    | AF099093.1                    | ubiquitin-conjugating enzyme UBC7                                                                               | (-)                                           |
| 1376723_at                    | AW142765                      | ESTs                                                                                                            | (-)                                           |
| 1386985_at                    | M28241.1                      | S-transferase mRNA                                                                                              | (-)                                           |
| 1385407_at                    | AI511405                      | ESTs                                                                                                            | (-)                                           |
| 1367581_at                    | AB001382.1                    | mRNA for osteopontin                                                                                            | (-)                                           |
| 1369151_at                    | NM_053744.1                   | delta-like 1 homolog (Drosophila) (Dlk1),                                                                       | (-)                                           |
| 1378252_at                    | AI029745                      | Transcribed locus                                                                                               | (-)                                           |
| 1389868_at                    | AA850780                      | Trehalase (brush-border membrane lycoprotein) carbohydrate metabolism trehalose metabolism organogenesis alpha, | (-)                                           |

|            |             |                                                                                                                                                                                                                                             |     |
|------------|-------------|---------------------------------------------------------------------------------------------------------------------------------------------------------------------------------------------------------------------------------------------|-----|
|            |             | alpha-trehalase activity hydrolase activity<br>hydrolase activity, acting on glycosyl bonds                                                                                                                                                 |     |
| 1377513_at | BI287026    | ESTs                                                                                                                                                                                                                                        | (-) |
| 1375687_at | BE097926    | RAB14, member RAS oncogene family<br>intracellular protein transport small GTPase<br>mediated signal transduction<br>neurotransmitter secretion protein transport<br>vesicle-mediated transport GTP binding<br>protein transporter activity | (-) |
| 1371954_at | BF290193    | ESTs                                                                                                                                                                                                                                        | (-) |
| 1370145_at | NM_023988.1 | zinc finger protein 354C (Znf354c),                                                                                                                                                                                                         | (-) |
| 1382127_at | AI716708    | ESTs                                                                                                                                                                                                                                        | (-) |
| 1371237_at | AF411318.1  | metallothionein 1 mRNA                                                                                                                                                                                                                      | (-) |
| 1393006_at | BF282112    | ESTs                                                                                                                                                                                                                                        | (-) |
| 1386879_at | NM_031832.1 | lectin, galactose binding, soluble 3 (Lgals3),                                                                                                                                                                                              | (-) |
| 1367985_at | NM_013197.1 | aminolevulinic acid synthase 2 (Alas2),                                                                                                                                                                                                     | (-) |
| 1387659_at | AF245172.1  | guanine deaminase (Gda) mRNA                                                                                                                                                                                                                | (-) |
| 1379058_at | AA900904    | Transcribed locus                                                                                                                                                                                                                           | (-) |
| 1375905_at | AI412746    | ESTs                                                                                                                                                                                                                                        | (-) |
| 1394643_at | AA819409    | Transcribed locus                                                                                                                                                                                                                           | (-) |
| 1382368_at | AA943075    | ESTs                                                                                                                                                                                                                                        | (-) |
| 1369144_at | NM_031739.1 | potassium voltage gated channel, Shal-<br>related family, member 3 (Kcnd3), mRNA                                                                                                                                                            | (-) |
| 1396289_at | BI283720    | Rattus norvegicus similar to MAM domain<br>containing glycosylphosphatidylinositol<br>anchor 1; glycosyl-phosphatidyl-inositol-<br>MAM (LOC309659), mRNA.                                                                                   | (-) |
| 1382778_at | AI231350    | Dual specificity phosphatase 6 protein<br>amino acid dephosphorylation<br>cell differentiation                                                                                                                                              | (-) |
| 1368064_at | U31884.1    | dopa decarboxylase amino acid metabolism<br>dopamine metabolism catecholamine<br>biosynthesis serotonin metabolism aromatic<br>L-amino acid decarboxylase mRNA                                                                              | (-) |
| 1391089_at | AW527270    | Transcribed locus                                                                                                                                                                                                                           | (-) |
| 1369132_at | M97381.1    | synaptic vesicle amine transporter (SVAT)<br>mRNA                                                                                                                                                                                           | (-) |
| 1369131_at | NM_013031.1 | solute carrier family 18 (vesicular<br>monoamine), member 2 (Slc18a2),                                                                                                                                                                      | (-) |
| 1384933_at | BF545691    | Solute carrier family 18 (vesicular<br>monoamine), member 2 transport<br>neurotransmitter transport synaptic vesicle<br>amine transport carbon utilization by<br>fixation of carbon dioxide                                                 | (-) |
| 1396950_at | BF405915    | ESTs                                                                                                                                                                                                                                        | (-) |
| 1368348_at | NM_013034.1 | solute carrier family 6 (neurotransmitter<br>transporter, serotonin), member 4 (Slc6a4)                                                                                                                                                     | (-) |
